# Supplementary material for: Production of Diverse Beauveriolide Analogs in Closely Related Fungi: a Rare Case of Fungal Chemodiversity
Source: PubMed Central journal article supplement (PMC7471007; doi:10.1128/msphere.00667-20), 2020-09-02
Supplement: mSphere.00667-20-st001.pdf [file mSphere.00667-20-st001.pdf]

**Table S1** Composition of BVDs identified before and in this study.

| Compound     | n             | R     | L-AA2 | L-AA3 | D-AA4    | MW           | Ref.   |            |     |
|--------------|---------------|-------|-------|-------|----------|--------------|--------|------------|-----|
| A            | 5             | Me    | Phe   | Val   | Val      | 529          | (1)    |            |     |
| B            | 5             | Me    | Val   | Phe   | Ile      | 543          | (1)    |            |     |
| Ba*          | 5             | Me    | Val   | Phe   | allo-Ile | 543          | (1, 2) |            |     |
| C            | 5             | Me    | Phe   | Phe   | Ile      | 591          | (1)    |            |     |
| Ca*          | 5             | Me    | Phe   | Phe   | allo-Ile | 591          | (1)    |            |     |
| D            | 3             | Me    | Phe   | Val   | Val      | 501          | (1)    |            |     |
| E            | 3             | Me    | Val   | Phe   | Ile      | 515          | (1)    |            |     |
| Ea           | 3             | Me    | Val   | Phe   | allo-Ile | 515          | (1)    |            |     |
| F            | 3             | Me    | Phe   | Phe   | Ile      | 563          | (1)    |            |     |
| Beauverolide | Fa#**         | 3     | Me    | Phe   | Phe      | allo-Ile     | 563    | (1)        |     |
|              | H             | 4     | H     | Phe   | Ala      | Leu          | 487    | (3)        |     |
|              | I             | 6     | H     | Phe   | Ala      | Leu          | 515    | (3)        |     |
|              | Ja            | 3     | Me    | Trp   | Phe      | allo-Ile     | 602    | (4)        |     |
|              | Ka*           | 5     | Me    | Trp   | Phe      | allo-Ile     | 630    | (4)        |     |
|              | L#**          | 5     | Me    | Phe   | Ala      | Leu          | 515    | (5)        |     |
|              | La**          | 5     | Me    | Phe   | Ala      | allo-Ile     | 515    | (5)        |     |
|              | M#**          | 3     | Me    | Val   | Ala      | Leu          | 439    | (6)        |     |
|              | N             | 3     | Me    | Try   | Ala      | Leu          | 503    | (6)        |     |
|              | P             | 5     | Me    | Val   | Ala      | Leu/allo-Ile | 467    | (6)        |     |
|              | Q             | 3     | Me    | Trp   | Ala      | Leu/allo-Ile | 526    | (7)        |     |
|              | R             | 5     | Me    | Trp   | Ala      | Leu/allo-Ile | 554    | (7)        |     |
|              | S             | 3     | Me    | Ala   | Ala      | Leu/allo-Ile | 411    | (8)        |     |
|              | Beauveriolide | I**   | 3     | Me    | Phe      | Ala          | Leu    | 487        | (9) |
|              |               | II#** | 5     | Me    | Phe      | Ala          | Leu    | 515        | (9) |
| III**        |               | 3     | Me    | Phe   | Ala      | allo-Ile     | 487    | (10)       |     |
| IV           |               | 3     | Me    | Val   | Ala      | Val          | 425    | (11)       |     |
| V**          |               | 3     | Me    | Val   | Ala      | allo-Ile     | 439    | (11)       |     |
| VI#**        |               | 3     | Me    | Val   | Ala      | Leu          | 439    | (11)       |     |
| VII**        |               | 3     | Me    | Phe   | Ala      | Val          | 473    | (11)       |     |
| VIII         |               | 5     | Me    | Val   | Ala      | allo-Ile     | 467    | (11)       |     |
| IX#**        |               | 3     | Me    | Phe   | Phe      | allo-Ile     | 563    | (11)       |     |
| X**          |               | 3     | Me    | Phe   | Phe      | Leu          | 563    | This study |     |

Note: #, Beauverolide Fa is structurally same to Beauveriolide IX, so as beauverolide L vs. beauveriolide II, and beauverolide M vs. beauveriolide VI. \*: Beauverolide Ba/Ca/Ka were identified from *B. bassiana* strains ARSEF 2860 and ARSEF 8028. \*\*: Beauveriolide I-III/V-VII/IX-X and beauverolide La were isolated from *B. brongniartii* (Br) and *C. militaris* (Cm), among which beauveriolide X is a new compound identified in this study.

## References

1. Elsworth JF, Grove JF. 1980. Cyclodepsipeptides from *Beauveria bassiana*. Part 2. Beauverolides A to F and their relationship to isarolide. J Chem Soc, Perkin Trans 1 1:1795-1799.
2. Isogai A, Kanaoka M, Matsuda H, Hori Y, Suzuki A. 1978. Structure of a new cyclodepsipeptide, beauverilide A from *Beauveria bassiana*. Agricultural and Biological Chemistry 42:1797-1798.

3. Elsworth JF, Grove JF. 1977. Cyclodepsipeptides from *Beauveria bassiana* Bals. Part 1. Beauverolides H and I. J Chem Soc, Perkin Trans 1:270-273.
4. Grove JF. 1980. Cyclodepsipeptides from *Beauveria bassiana*. Part 3. The isolation of beauverolides Ba, Ca, Ja, and Ka. J Chem Soc, Perkin Trans 1:2878-2880.
5. Jegorov A, Sedmera P, Matha V, Simek P, Zahradnickova H, Landa Z, Eyal J. 1994. Beauverolides L and La from *Beauveria tenella* and *Paecilomyces fumosoroseus*. Phytochemistry 37:1301-1303.
6. Kuzma M, Jegorov A, Kacer P, Havlicek V. 2001. Sequencing of new beauverolides by high-performance liquid chromatography and mass spectrometry. J Mass Spectrom 36:1108-1115.
7. Jegorov A, Paizs B, Kuzma M, Zabka M, Landa Z, Sulc M, Barrow MP, Havlicek V. 2004. Extraribosomal cyclic tetradepsipeptides beauverolides: profiling and modeling the fragmentation pathways. J Mass Spectrom 39:949-960.
8. Jegorov A, Hajduch M, Sulc M, Havlicek V. 2006. Nonribosomal cyclic peptides: specific markers of fungal infections. J Mass Spectrom 41:563-576.
9. Mochizuki K, Ohmori K, Tamura H, Shizuri Y, Nishiyama S, Miyoshi E, Yamamura S. 1993. The structures of bioactive cyclodepsipeptides, beauveriolides I and II, metabolites of entomopathogenic fungi *Beauveria* sp. Bull Chem Soc Jpn 66:3041-3046.
10. Namatame I, Tomoda H, Tabata N, Si S, Omura S. 1999. Structure elucidation of fungal beauveriolide III, a novel inhibitor of lipid droplet formation in mouse macrophages. J Antibiot (Tokyo) 52:7-12.
11. Matsuda D, Namatame I, Tomoda H, Kobayashi S, Zocher R, Kleinkauf H, Omura S. 2004. New beauveriolides produced by amino acid-supplemented fermentation of *Beauveria* sp. FO-6979. J Antibiot (Tokyo) 57:1-9.
