# Supplementary material for: Production of Diverse Beauveriolide Analogs in Closely Related Fungi: a Rare Case of Fungal Chemodiversity
Source: PubMed Central journal article supplement (PMC7471007; doi:10.1128/msphere.00667-20), 2020-09-02
Supplement: mSphere.00667-20-st002.pdf [file mSphere.00667-20-st002.pdf]

**Table S2** Putative compositions of the compounds obtained from the mutant  $\Delta CmbesB$  fed with 3-HDA and 3-HOA.

| HPLC peaks* | Putative compounds | n | R | L-X | L-Y | D-Z      | MW** |
|-------------|--------------------|---|---|-----|-----|----------|------|
| Peaks 1     | Dm-La              | 5 | H | Phe | Ala | allo-Ile | 501  |
|             | Dm-L (II)          | 5 | H | Phe | Ala | Leu      | 501  |
| Peaks 2     | Dm-V               | 3 | H | Val | Ala | allo-Ile | 425  |
|             | Dm-VI              | 3 | H | Val | Ala | Leu      | 425  |
|             | Dm-VII             | 3 | H | Phe | Ala | Val      | 459  |
| Peaks 3     | Dm-III             | 3 | H | Phe | Ala | allo-Ile | 473  |
|             | Dm-I               | 3 | H | Phe | Ala | Leu      | 473  |
| Peaks 4     | Dm-IX              | 3 | H | Phe | Phe | allo-Ile | 549  |
|             | Dm-X               | 3 | H | Phe | Phe | Leu      | 549  |

\*, Peaks are as shown in Fig. 3B. \*\*, MW, molecular weight. Dm, demethyl.
