# Supplementary material for: Production of Diverse Beauveriolide Analogs in Closely Related Fungi: a Rare Case of Fungal Chemodiversity
Source: PubMed Central journal article supplement (PMC7471007; doi:10.1128/msphere.00667-20), 2020-09-02
Supplement: mSphere.00667-20-st003.pdf [file mSphere.00667-20-st003.pdf]

**Table S3 PCR Primers used in this study.**

| Genes                      | Name                  | Primer sequence                      | RE*              | Note                                                 |
|----------------------------|-----------------------|--------------------------------------|------------------|------------------------------------------------------|
| <i>besA</i><br>BBA_08222   | U1                    | CGGGATCCCCGACCTGCAACCTAGTTTTT        | BamH I           | Gene deletion                                        |
|                            | U2                    | CGGGATCCACTGACATGTCCCCTGAGTT         |                  |                                                      |
|                            | L1                    | GGA CTAGTCGATGTCTGCTTTTCATACG        | Spe I            |                                                      |
|                            | L2                    | GGA CTAGTAGTCATCATCAATCACGAC         |                  |                                                      |
|                            | F                     | CTCCCTTTCTATGGCGAATA                 |                  |                                                      |
| R                          | TCTGAAAGGTCATGATGGTG  | PCR verification                     |                  |                                                      |
| <i>besB</i><br>BBA_08219   | U1                    | CGGGATCCAGATGGAAGTGGCTTTCTTG         | BamH I           | Gene deletion                                        |
|                            | U2                    | CGGGATCCTGCTTCAGAAACCTGACAGA         | Spe I            |                                                      |
|                            | L1                    | GGA CTAGTAGTCGACAACCTCATCCCAAT       |                  |                                                      |
|                            | L2                    | GGA CTAGTCGCCCAAAAAAGTAACAAACT       |                  |                                                      |
|                            | F                     | GCGTCTACAACAACATGAGC                 | PCR verification |                                                      |
| R                          | TGTTGTGCATTTTCAGATCC  |                                      |                  |                                                      |
| <i>besC</i><br>BBA_08220   | U1                    | CGGAATTCGACTCGTTGCTTTGTCTGTC         | EcoR I           | Gene deletion                                        |
|                            | U2                    | CGGGATCCCCGAGCACAAAGATTGGCATAG       | BamH I           |                                                      |
|                            | L1                    | GGA CTAGTAGTGACGCTGTGCATTTTAC        | Spe I            |                                                      |
|                            | L2                    | GGA CTAGTGCAACTGTACTTCGAAACCC        |                  |                                                      |
|                            | F                     | CTTTTCTCGGGCTCATTGTG                 |                  |                                                      |
| R                          | CTGTCACGACTAGATCAGGG  |                                      |                  |                                                      |
| <i>besD</i><br>BBA_08221   | U1                    | GGA CTAGTTGCGAGGACTAAGAACAGAC        | Spe I            | Gene deletion                                        |
|                            | U2                    | GGA CTAGTATCAAGGTCAAGGTGAGTGG        | BamH I           |                                                      |
|                            | L1                    | CGGGATCCGTGGA ACTATGGGATGCAGA        |                  |                                                      |
|                            | L2                    | CGGAATTCACACTAGCTGACACCTCATG         |                  |                                                      |
|                            | F                     | TAGAGTCATCGTTGGTCAGC                 | PCR verification |                                                      |
| R                          | TGGATGAAAATGCAACGACC  |                                      |                  |                                                      |
| <i>BrbesA</i><br>BBO_00138 | U1                    | GCTTGATATCGAATTGTTGGCTTGCTCGGTAAGAG  | EcoR I           | Fusion PCR for gene deletion                         |
|                            | U2                    | CGGGCTGCAGGAATTGTGGAACGATACTCGGCACT  | Spe I            |                                                      |
|                            | L1                    | GATCTGATGAACTAGTGGGAGATCCATCAGGTAGG  |                  |                                                      |
|                            | L2                    | CCGCTCTAGAACTAGCTACATATCCGCTGCTGCAA  |                  |                                                      |
|                            | F                     | CTCTCAACGAAAAGGGTTTCG                | PCR verification |                                                      |
| R                          | ACACGCTTCTGCACCAACTT  |                                      |                  |                                                      |
| <i>BrbesB</i><br>BBO_00141 | U1                    | GCTTGATATCGAATTATTCGTAAGCCCCCTTGT    | EcoR I           | Fusion PCR for gene deletion                         |
|                            | U2                    | CGGGCTGCAGGAATTGCAGTCTATATGGGGCGAGA  | Spe I            |                                                      |
|                            | L1                    | GATCTGATGAACTAGGAAGCAAAGGTGAGCCACTC  |                  |                                                      |
|                            | L2                    | CCGCTCTAGAACTAGCTGGCTGCACTGATGAAAAA  |                  |                                                      |
|                            | F                     | GGTGTACTTCAGCCGTATCCA                | PCR verification |                                                      |
| R                          | CATTAGGCGAGCCCTATGAG  |                                      |                  |                                                      |
| <i>CmbesA</i><br>CCM_01285 | U1                    | GCTTGATATCGAATTGAATCCGACTCCTTGGTTGA  | EcoR I           | Fusion PCR for gene deletion                         |
|                            | U2                    | CGGGCTGCAGGAATTCTAGGGCGACGAAAGACTTG  | Spe I            |                                                      |
|                            | L1                    | GATCTGATGAACTAGCACGACAGGTAGAGCAACGA  |                  |                                                      |
|                            | L2                    | CCGCTCTAGAACTAGCTTTTCGAAACACGTGCAGA  |                  |                                                      |
|                            | F                     | ACGGATGAGAACGAGCAAGT                 | PCR verification |                                                      |
| R                          | TGAGCGTCTCAAAAATCGTTG |                                      |                  |                                                      |
| <i>CmbesB</i><br>CCM_01282 | U1                    | GCTTGATATCGAATTGCTCCGCTGATGAAAAAGAC  | EcoR I           | Fusion PCR for gene deletion                         |
|                            | U2                    | CGGGCTGCAGGAATTCTTTCCAGCTCCAAA ACTGC | Spe I            |                                                      |
|                            | L1                    | GATCTGATGAACTAGCGCACAGTTTGAGTTGGAAA  |                  |                                                      |
|                            | L2                    | CCGCTCTAGAACTAGGGGGAGAATACTCCGGGTA   |                  |                                                      |
|                            | F                     | CTAGAAGAAGGCGGTGTTGG                 | PCR verification |                                                      |
| R                          | GGATATTGATCAGCCGCACT  |                                      |                  |                                                      |
| <i>CmbesD</i><br>CCM_01284 | Dfus-F                | TTTTAATCAATAACAATGATCTTTTCATCGCCAGC  |                  | Fusion PCR for gene complementation of $\Delta besD$ |
|                            | Dfus-R                | CACGTCGACGGATCCTCAATTCGATGCCGCTTTCT  |                  |                                                      |

\*RE, restriction enzyme.
